# Supplementary material
Source: PubMed Central journal article supplement (PMC6993574)

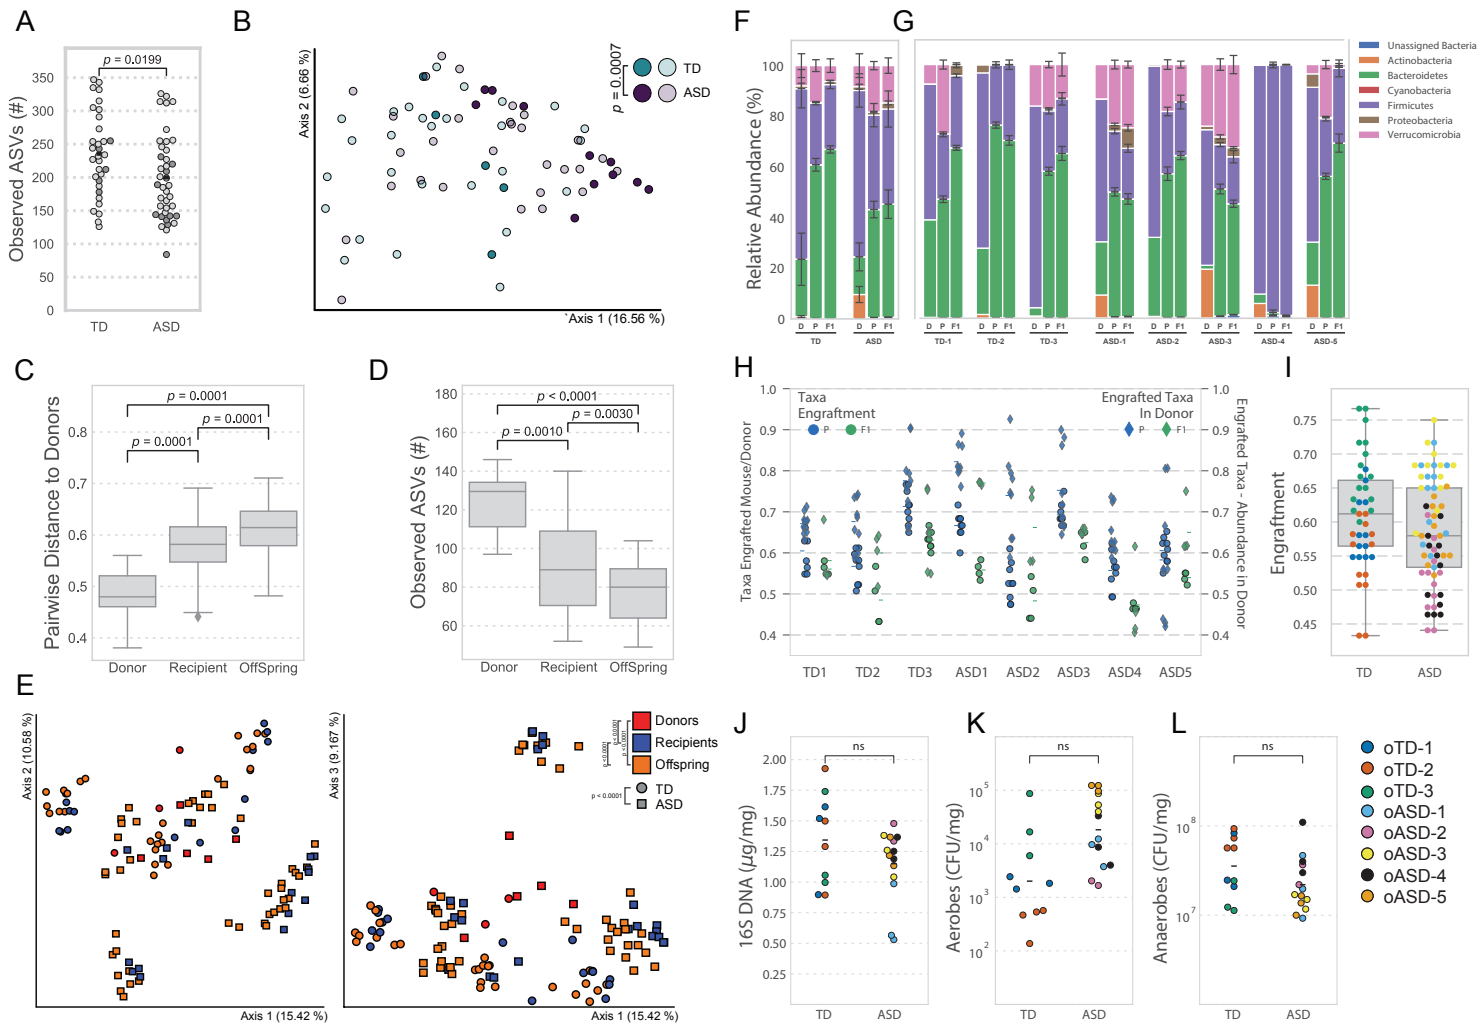

Supplement: NIHMS1528786-supplement-1.pdf [file NIHMS1528786-supplement-1.pdf]

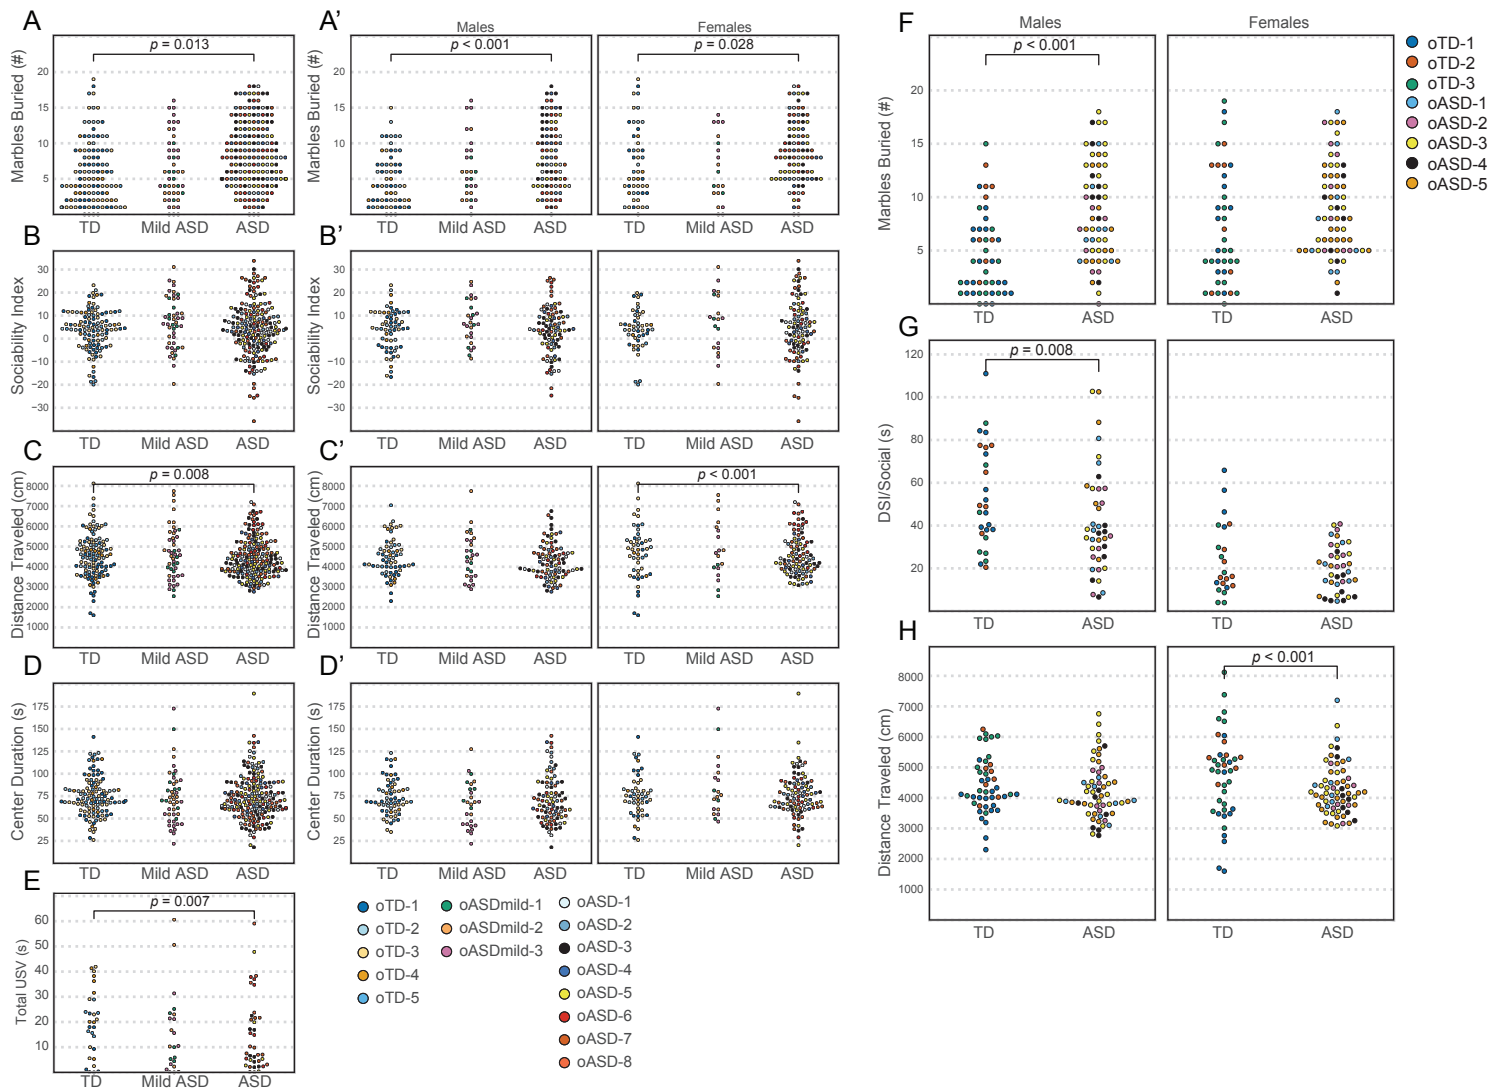

Supplement: NIHMS1528786-supplement-2.pdf [file NIHMS1528786-supplement-2.pdf]

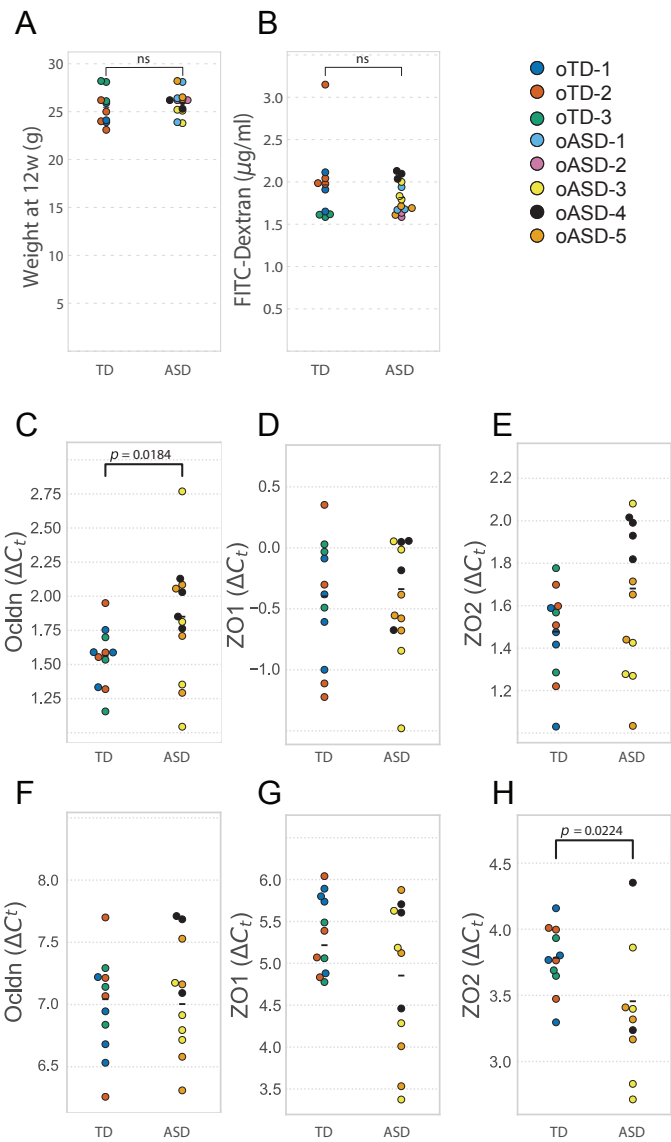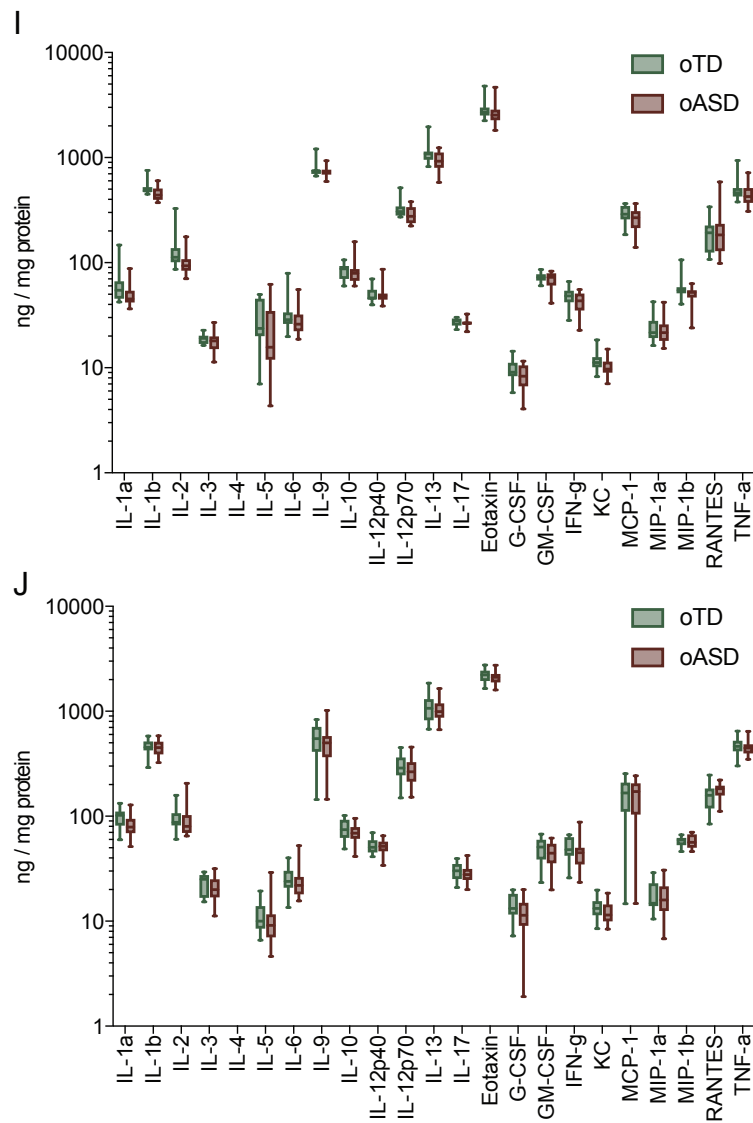

Supplement: NIHMS1528786-supplement-3.pdf [file NIHMS1528786-supplement-3.pdf]

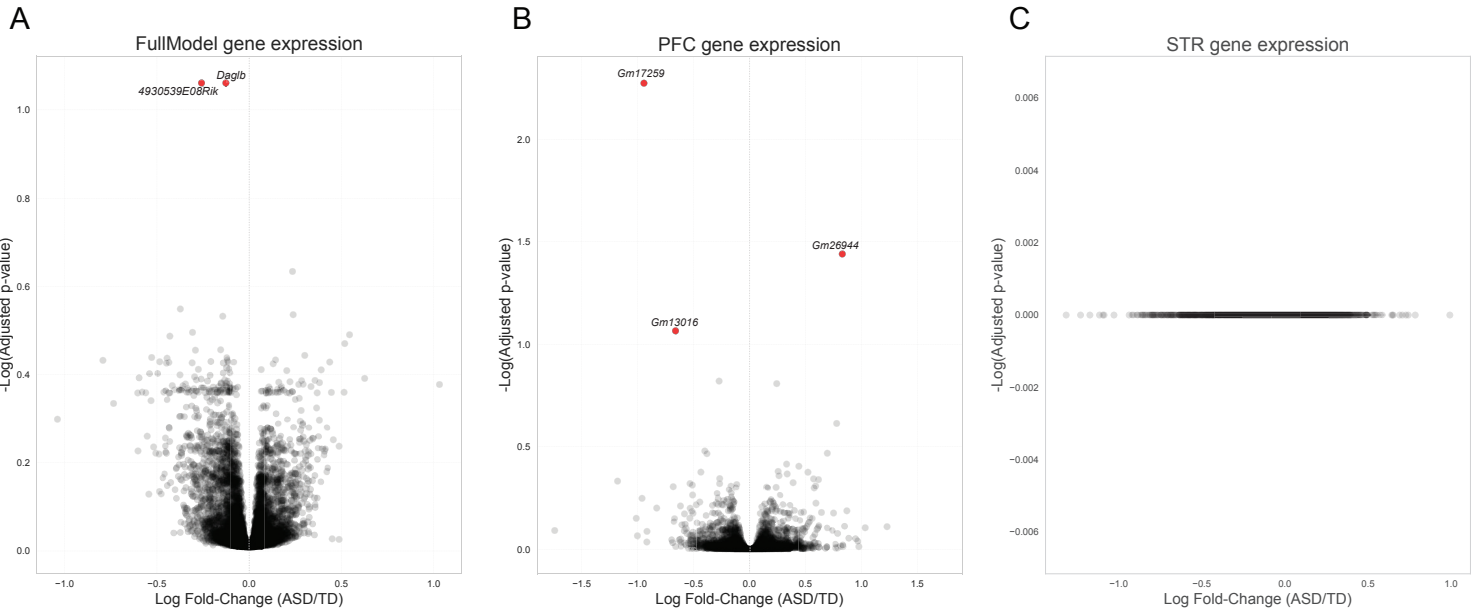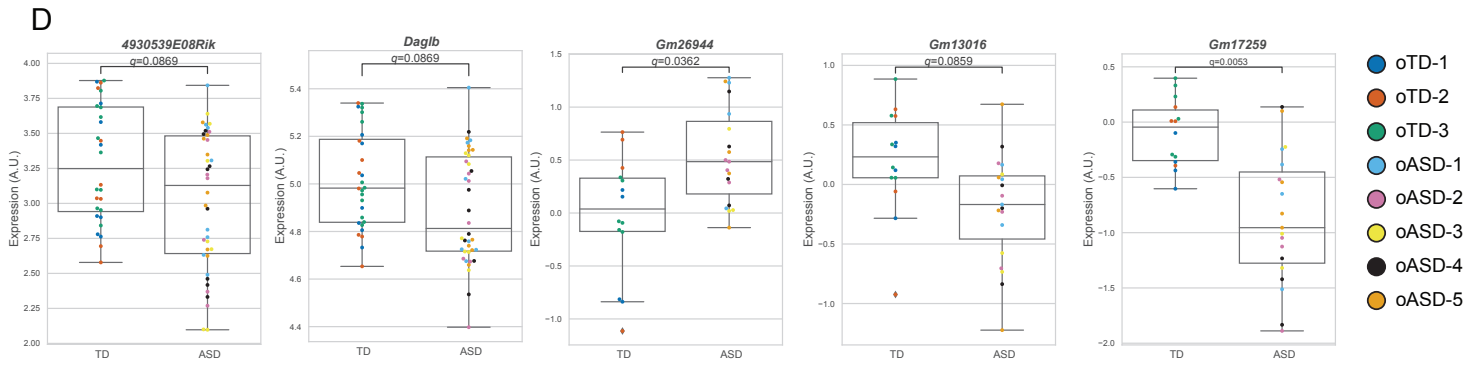

Supplement: NIHMS1528786-supplement-4.pdf [file NIHMS1528786-supplement-4.pdf]

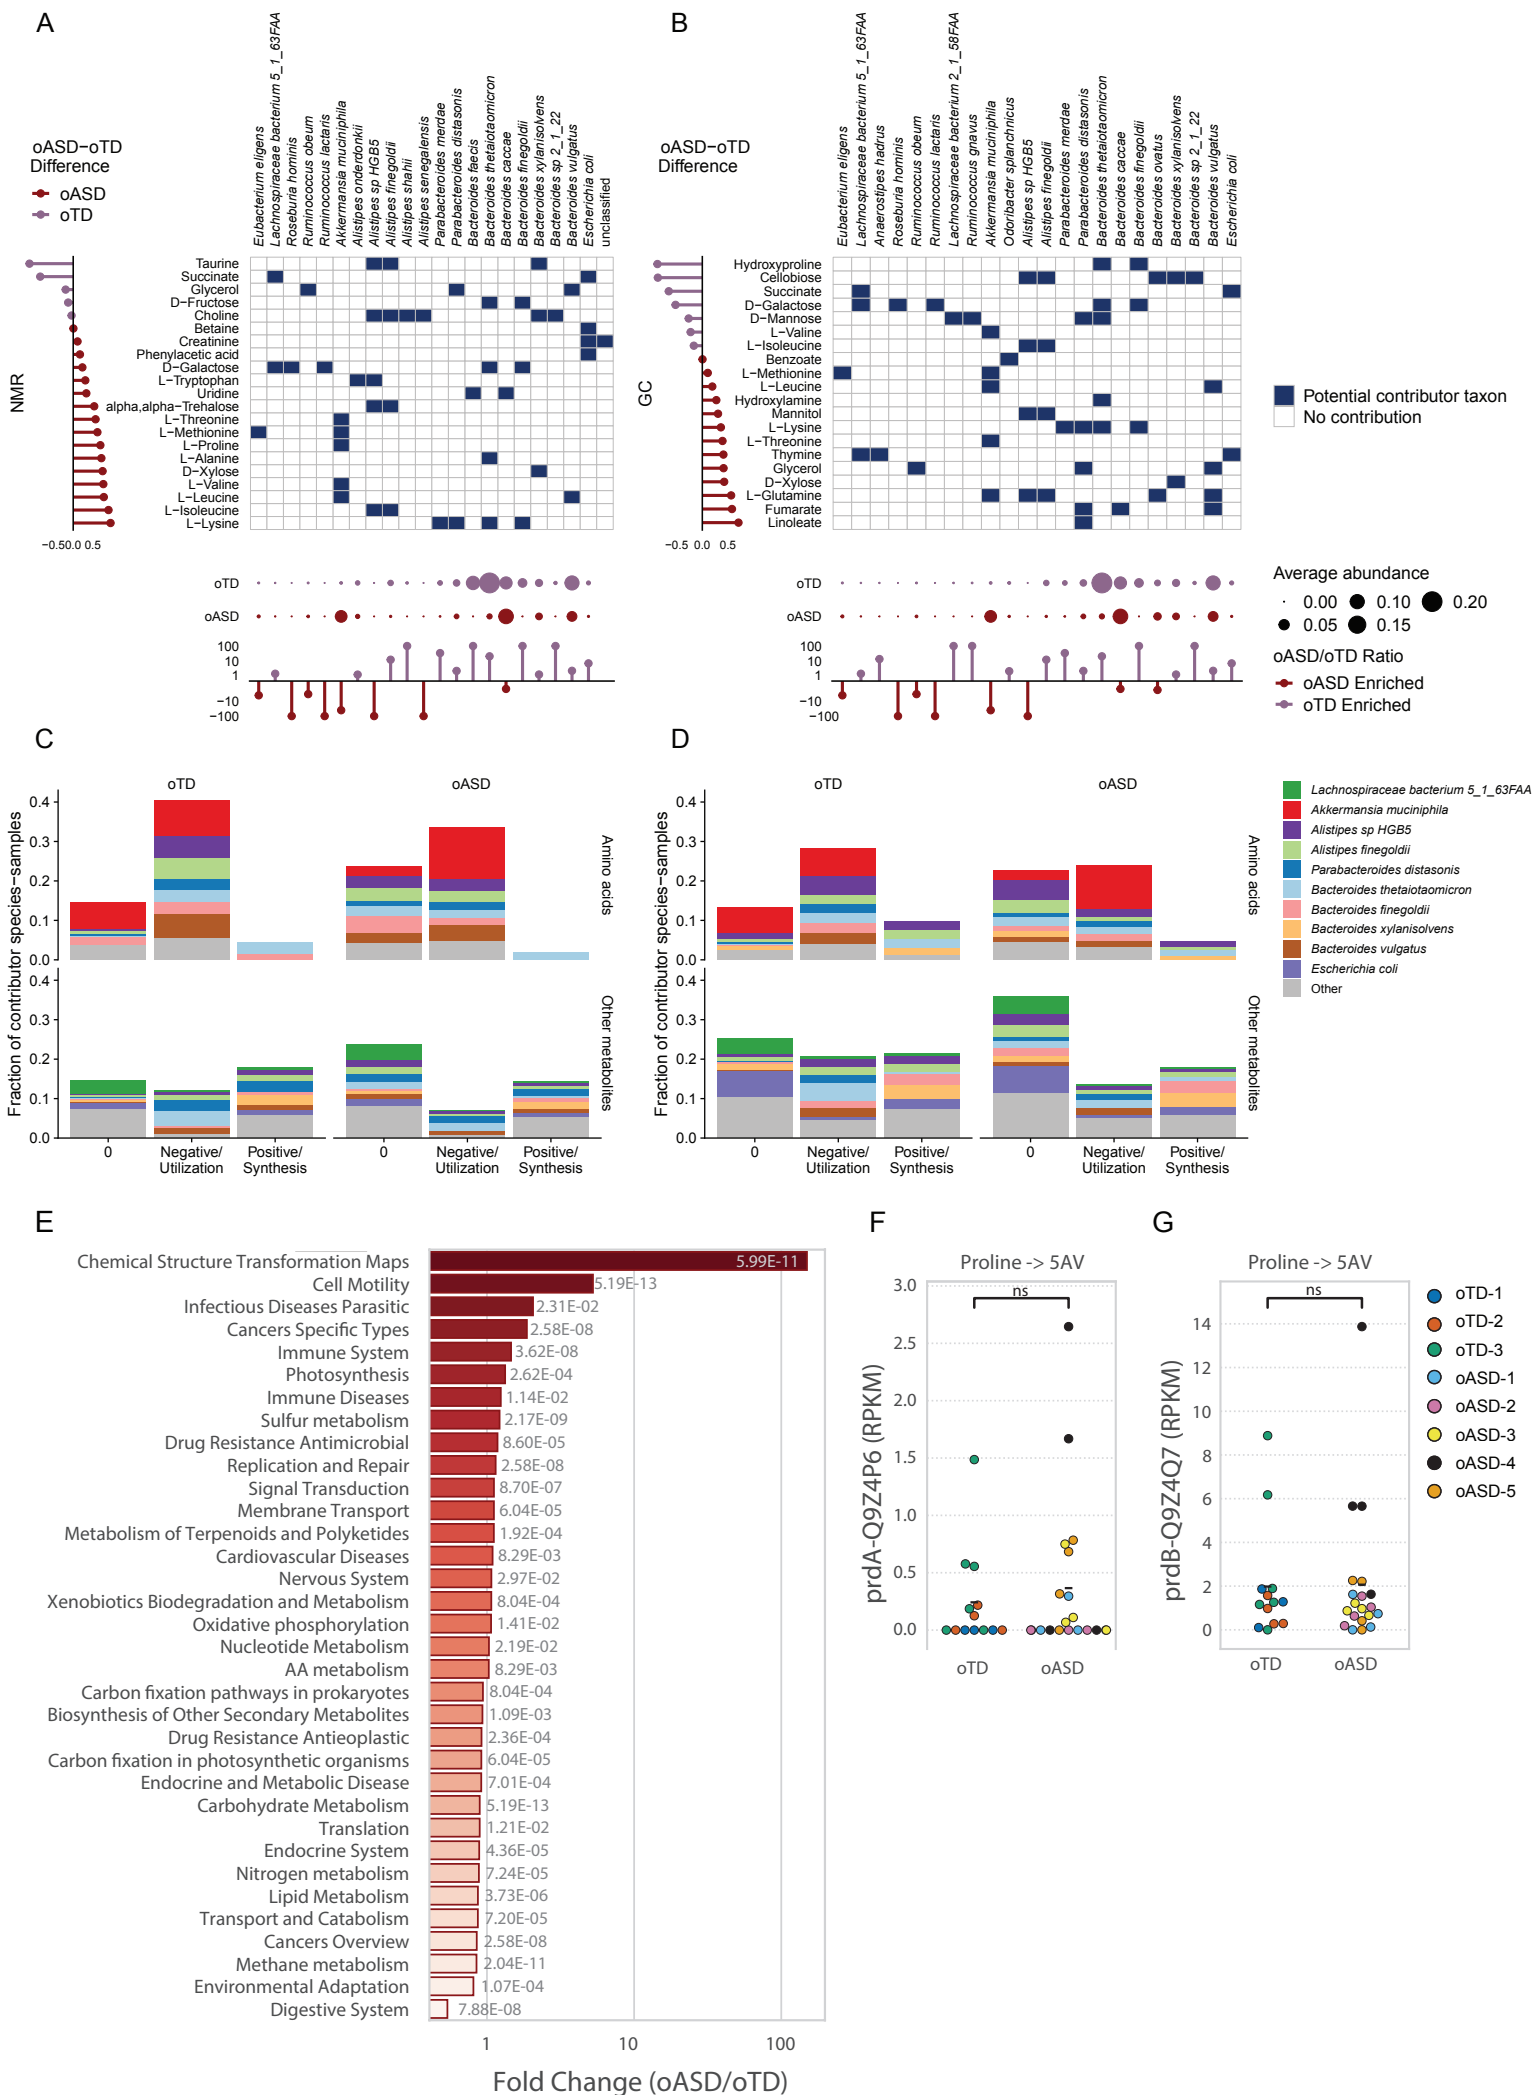

Supplement: NIHMS1528786-supplement-5.pdf [file NIHMS1528786-supplement-5.pdf]

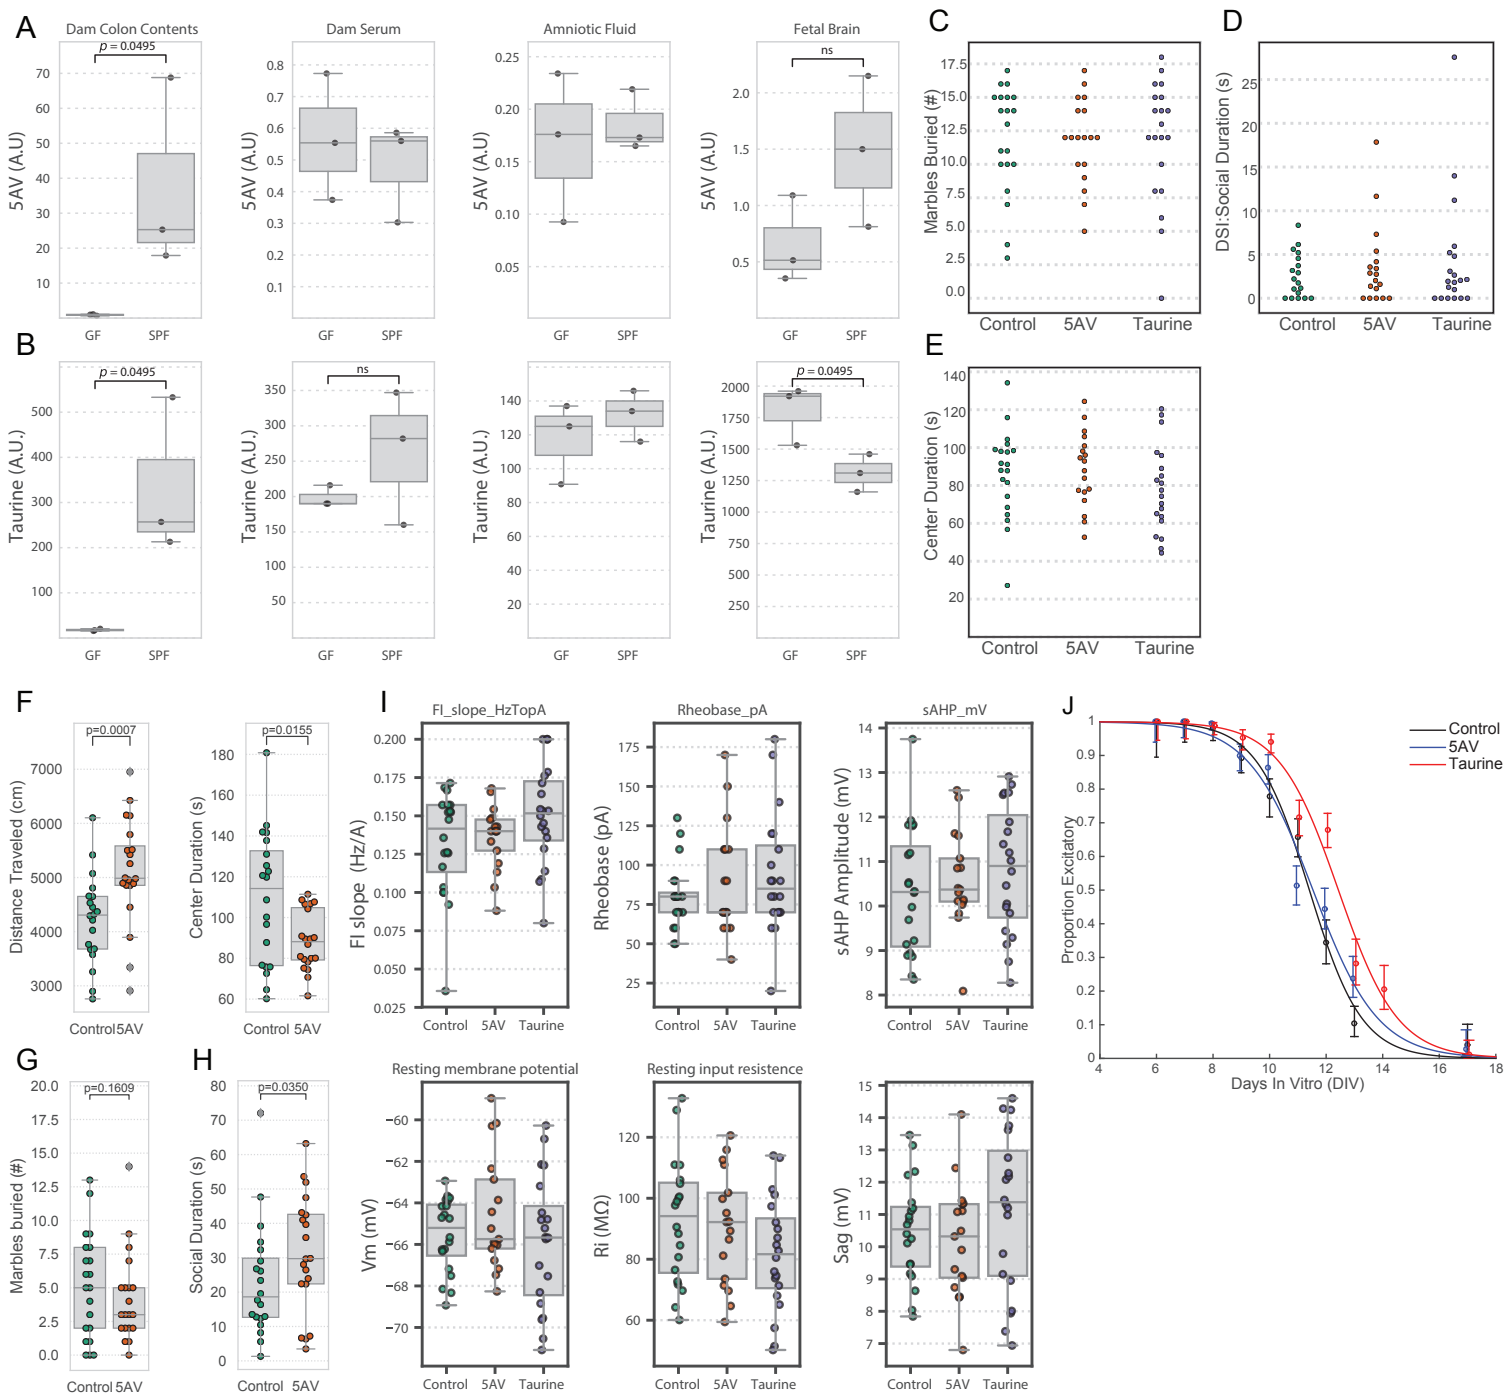

Supplement: NIHMS1528786-supplement-6.pdf [file NIHMS1528786-supplement-6.pdf]
